# Supplementary material
Source: PubMed Central journal article supplement (PMC8738106)
Supplement: NIHMS1730701-supplement-1.pdf [file NIHMS1730701-supplement-1.pdf]

## Supplementary Figure S1

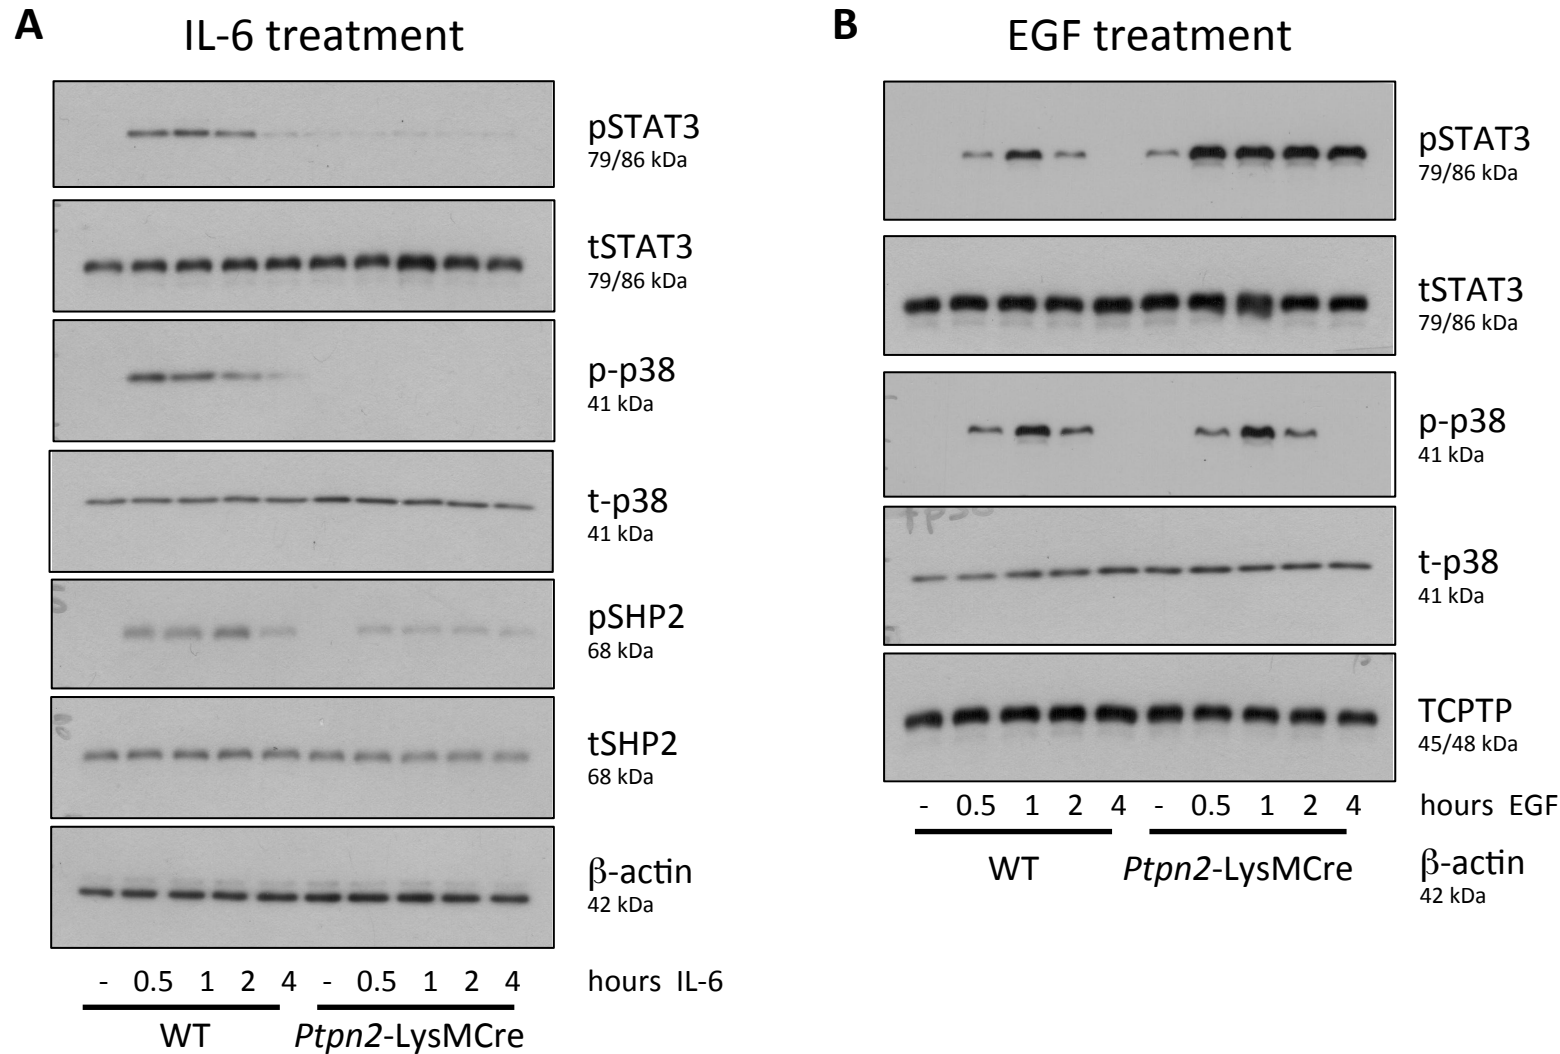

**Supplementary Figure S1. Impaired response to IL-6 in PTPN2-deficient BMDM.** BMDM from WT or *Ptpn2-LysMCre* mice were treated for the indicated time with IL-6 (A) or EGF (B) and analyzed for the indicated proteins. n = 5 independent repetitions. Related to main Figure 1.

### Supplementary Figure S2

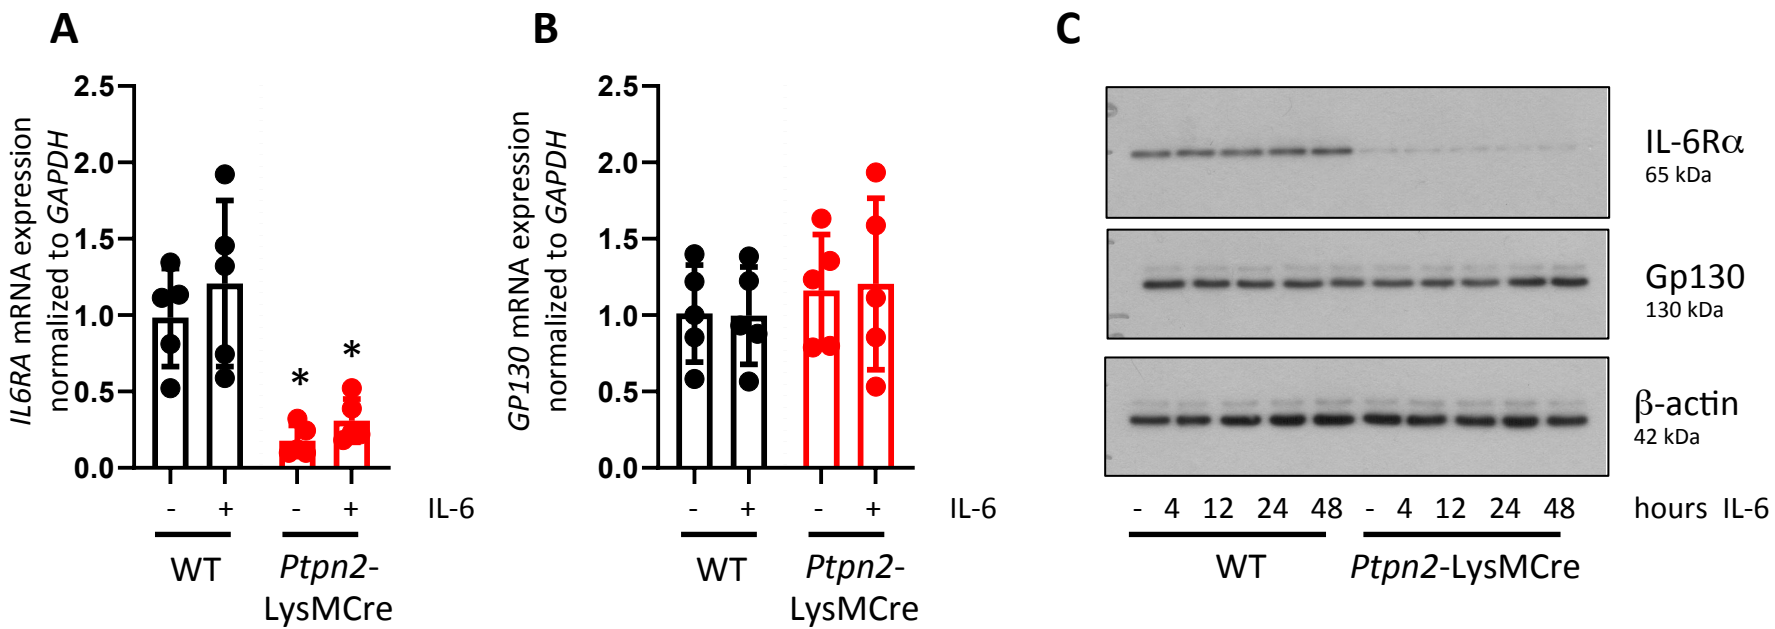

**Supplementary Figure S2. Diminished IL-6Ra expression in PTPN2-deficient BMDM.** BMDM from WT or *Ptpn2*-LysMCre mice were treated for 24 h (A+B) or the indicated time (C) with IL-6. mRNA expression levels of **A)** *Il6ra*, and **B)** *Gp130* normalized to *Gapdh* and untreated WT cells. **C)** Representative Western blot pictures for the indicated proteins. n = 5 independent repetitions. \* = p < 0.05, ANOVA with Dunn’s multiple comparisons test. Related to main Figure 2.

## Supplementary Figure S3

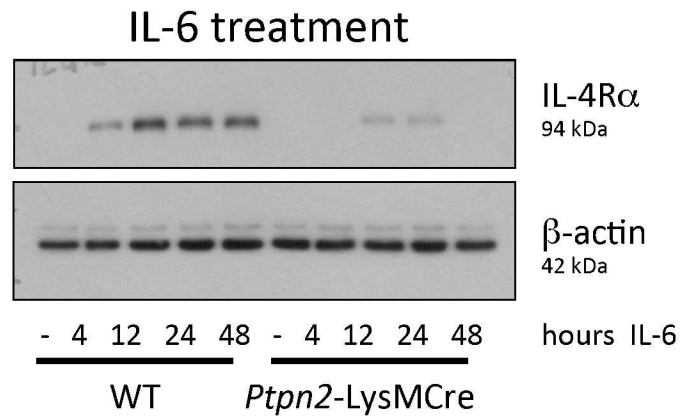

**Supplementary Figure S3. Lack of IL-6-induced IL-4Ra upregulation in PTPN2-deficient BMDM.** Bone marrow-derived macrophages from WT or *Ptpn2*-LysMCre mice were treated for the indicated times with IL-6 and analyzed by Western blot for IL-4Ra expression. n = 3 independent repetitions with three technical replicas each. Related to main Figure 3.

### Supplementary Figure S4

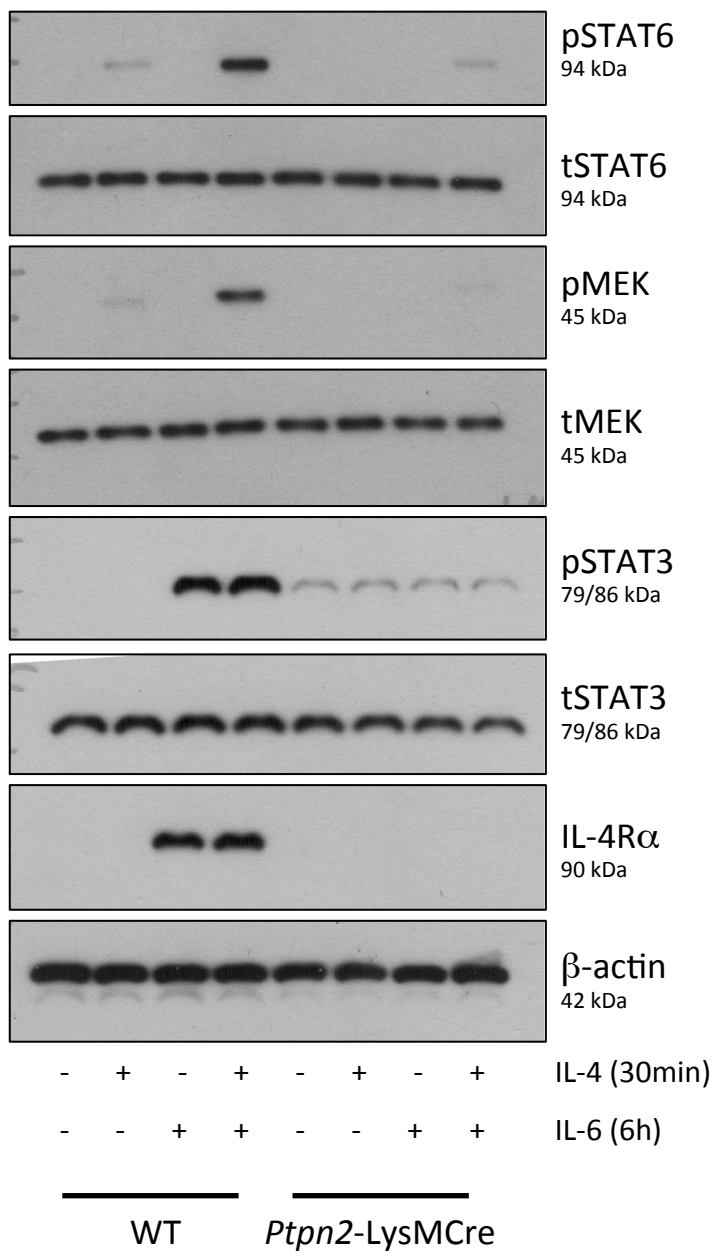

**Supplementary Figure S4. PTPN2-deficient BMDM fail to react to IL-4.** Bone marrow-derived macrophages from WT or *Ptpn2*-LysMCre mice were treated for 6 h with IL-6 prior to treatment with IL-4 for 30 min. and analyzed by Western blot for the indicated proteins. n = 3 independent repetitions. Related to main Figure 4.

## Supplementary Figure S5

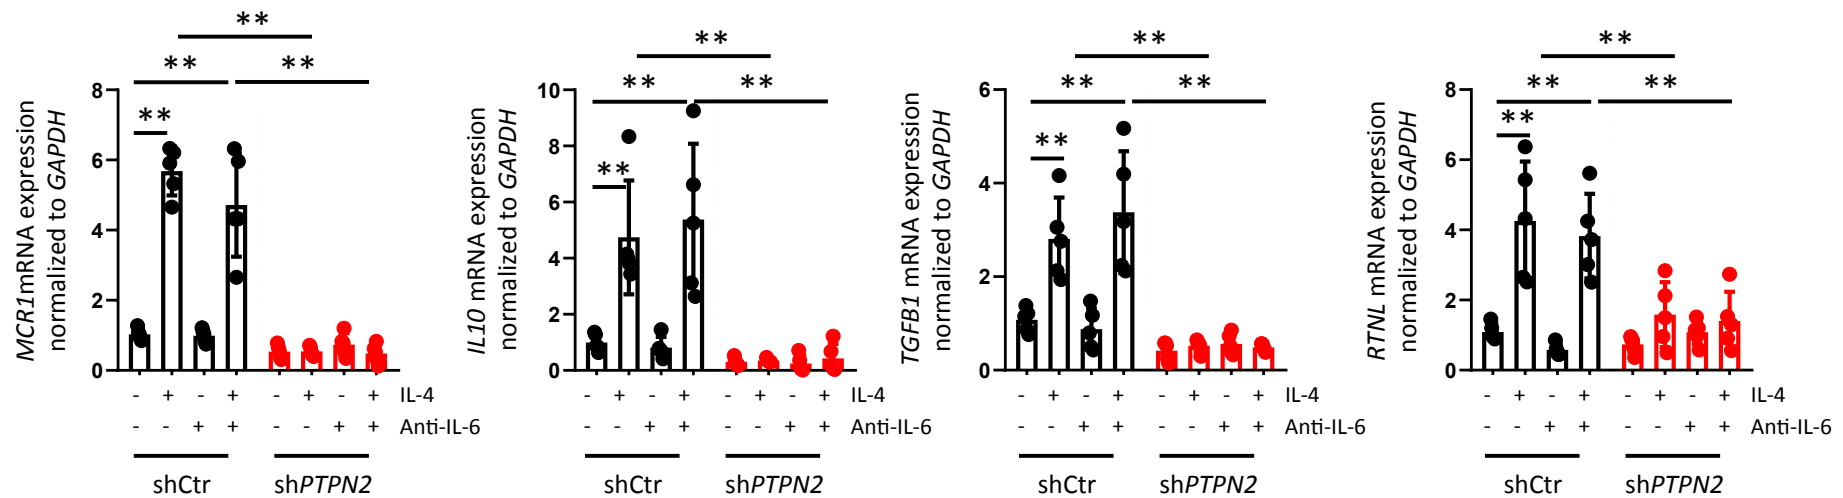

**Supplementary Figure S5. Basal activation of the IL-6 pathway during IL-4 treatment is not responsible for reduced response to IL-4.** THP-1 cells expressing non-targeting control (shCtrl) or *PTPN2*-specific (shPTPN2) shRNA were differentiated into macrophages and treated with IL-4 in presence with anti-IL-6 for 24 h and analyzed for mRNA expression of *MCR1* (encoding CD206), *IL10* and *TGFB1*, and *RTNL*. \*\* = p < 0.01, ANOVA with Dunnett's multiple comparisons test. Representative results from five independent experiments (n=5).

# Supplementary Figure S6

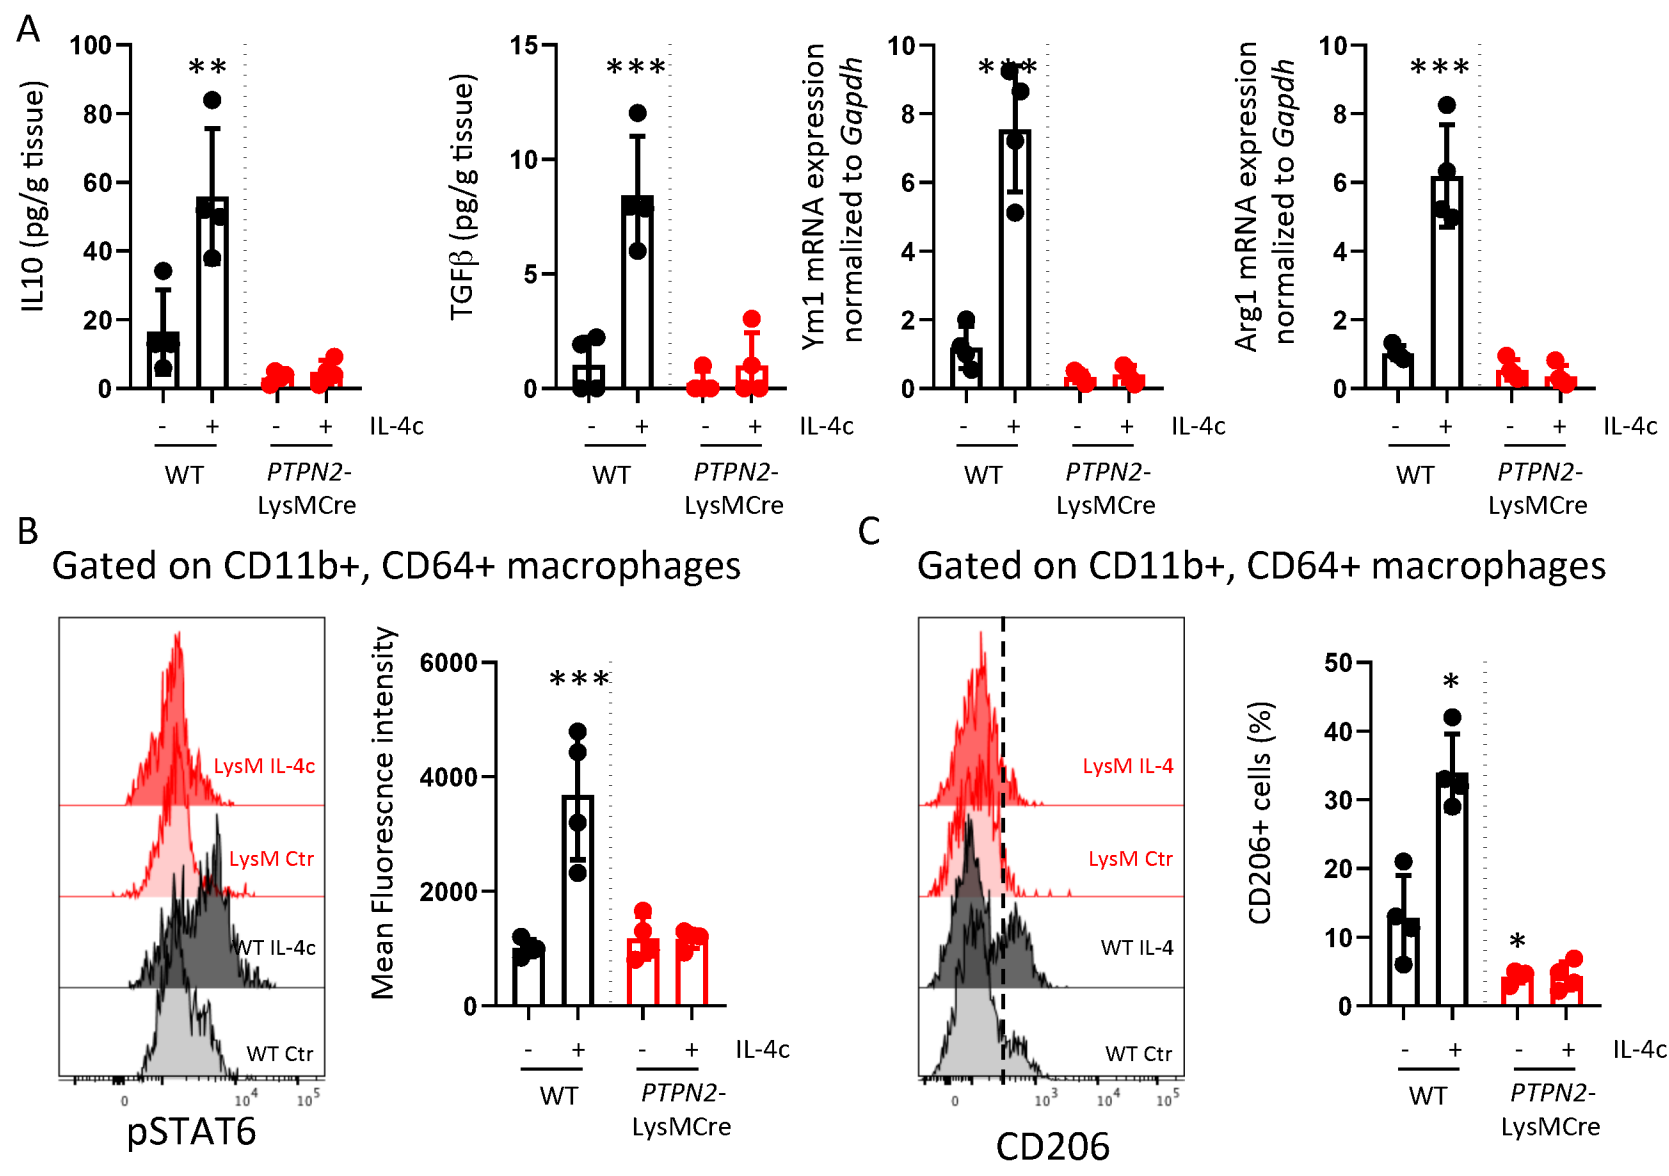

**Supplementary Figure S6. PTPN2 deficiency in myeloid cells results in loss of macrophage response to IL-4 in the intestine.** **A)** WT and *Ptpn2*-LysMCre mice were injected intraperitoneally with IL-4-IL-4R immunocomplexes and **A)** colonic tissue analyzed for IL-10 and TGFB after 24 h, **B)** colonic lamina propria immune cells collected after 2 h and STAT6 phosphorylation analyzed in colonic macrophages (gated as live, single, CD45+, CD11b+, Gr1-, CD64+ cells), **C)** colonic lamina propria immune cells were isolated 24 h after injection and macrophages analyzed for the proportion of CD206+ cells. Gated as in (B). \* = p < 0.05, \*\* = p < 0.01, \*\*\* = p < 0.001, ANOVA with Holm-Sidak's multiple comparisons test. Related to main Figure 5. Representative results from one out of two independent experiments with 3-5 mice/group.

## Supplementary Figure S7

A

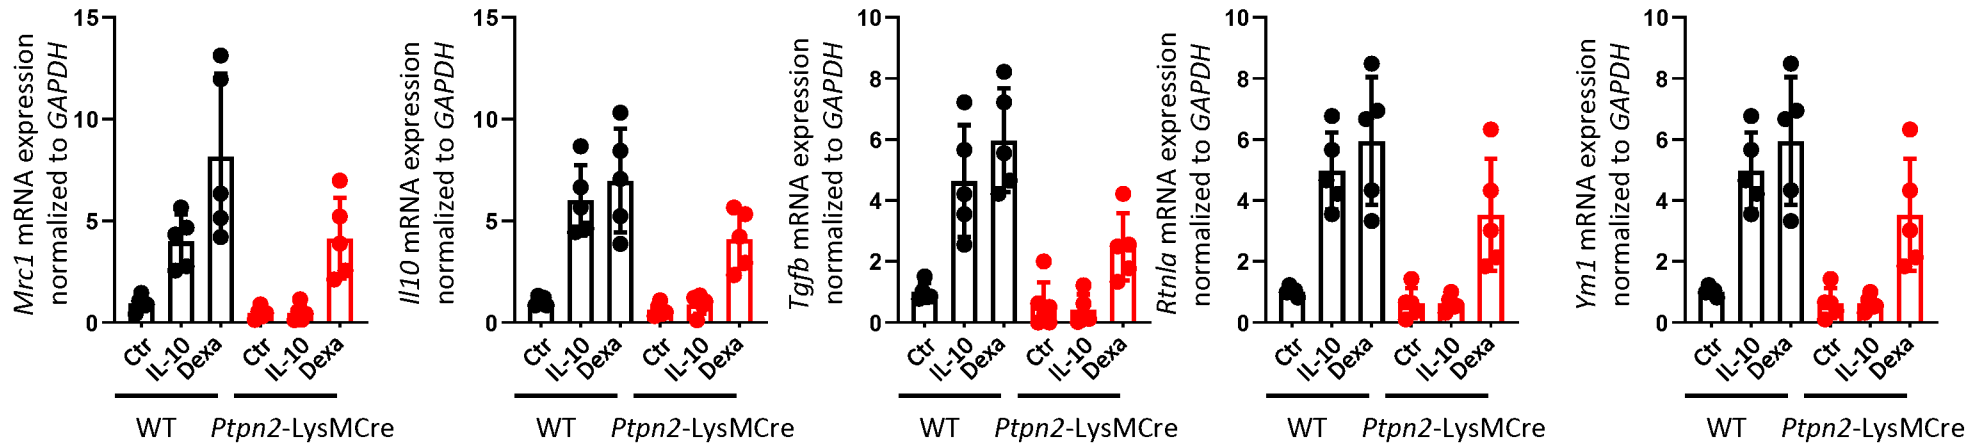

B

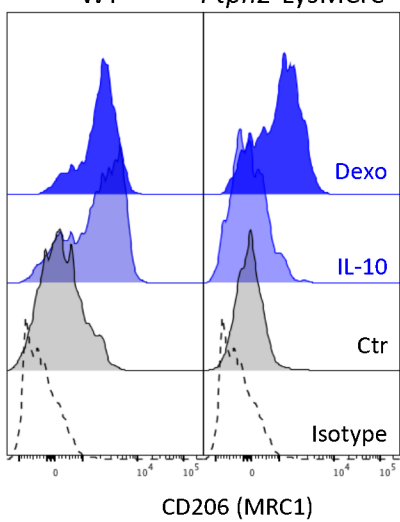

C

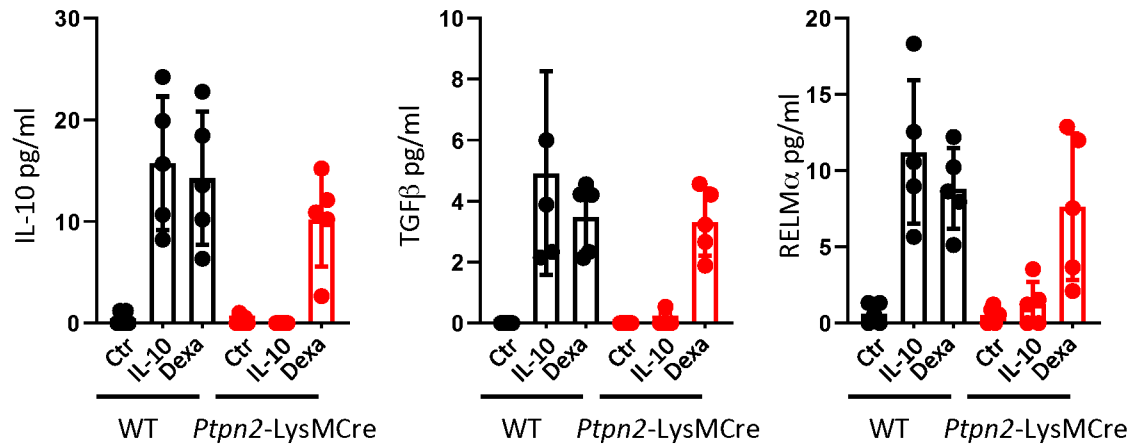

**Supplementary Figure S7. PTPN2-deficient macrophages develop into M2 macrophages upon dexamethasone, but not upon IL-10 treatment.** BMDM from WT or *Ptpn2-LysMCre* mice were treated for 24 h with IL-10 or dexamethasone and analyzed for **A)** mRNA expression of the indicated genes, **B)** surface expression of CD206, and **C)** secretion of IL-10, TGFB, and RELM $\alpha$ . n = 5 independent repetitions. Related to main Figure 4.

### Supplementary Figure S8

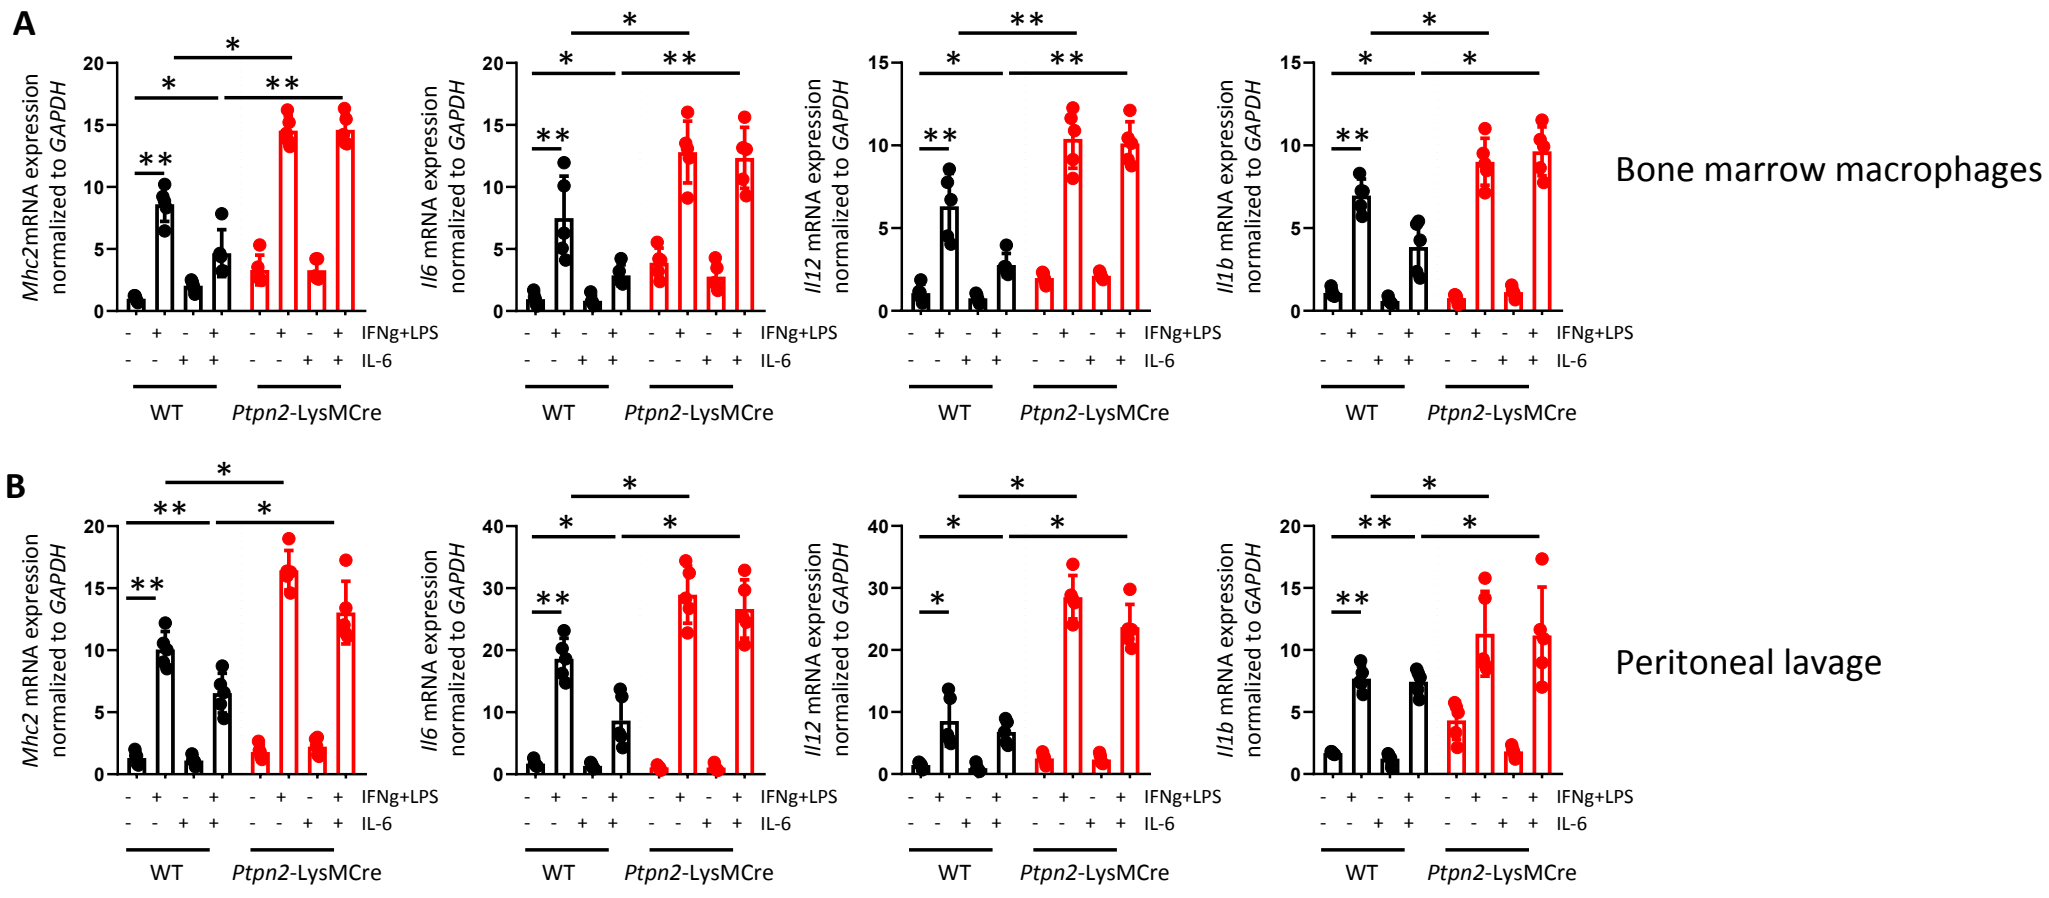

**Supplementary Figure S8. Knockdown of PTPN2 promotes M1 marker expression. A)** Bone marrow-derived macrophages from WT or *Ptpn2-LysMCre* mice were pre-treated with IL-6 for 6 h prior to treatment with IFNg (500IU) and LPS (50ng) for 24 h and analyzed for mRNA expression of *Mhc2*, *IL6*, *Il12*, and *Il1b*; **B)** *Ptpn2-LysMCre* and their WT littermates were injected intraperitoneally with LPS (1mg) and IFNg (1000IU) and peritoneal cells isolated 24 h later and analyzed as in A. \* = p < 0.05; \*\* = p < 0.01 relative to untreated control cells, ANOVA with Dunnett's multiple comparisons test. Pooled data from two independent experiments with 2-3 mice per experiment (n=5).



## Supplementary Figure S9

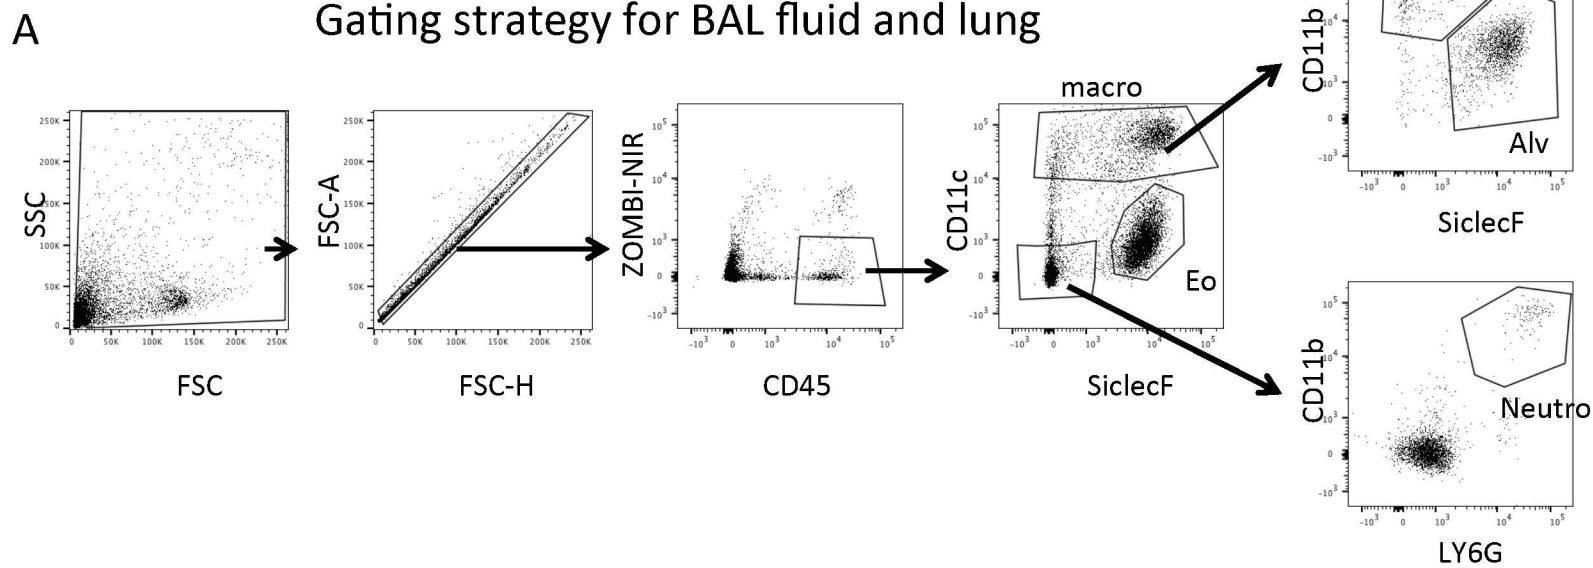

**Supplementary Figure S9. Gating strategy for immune cells in the lung and BAL.**

Representative dot plots and gating strategy used to discriminate different immune cell subsets in the lung and BAL.

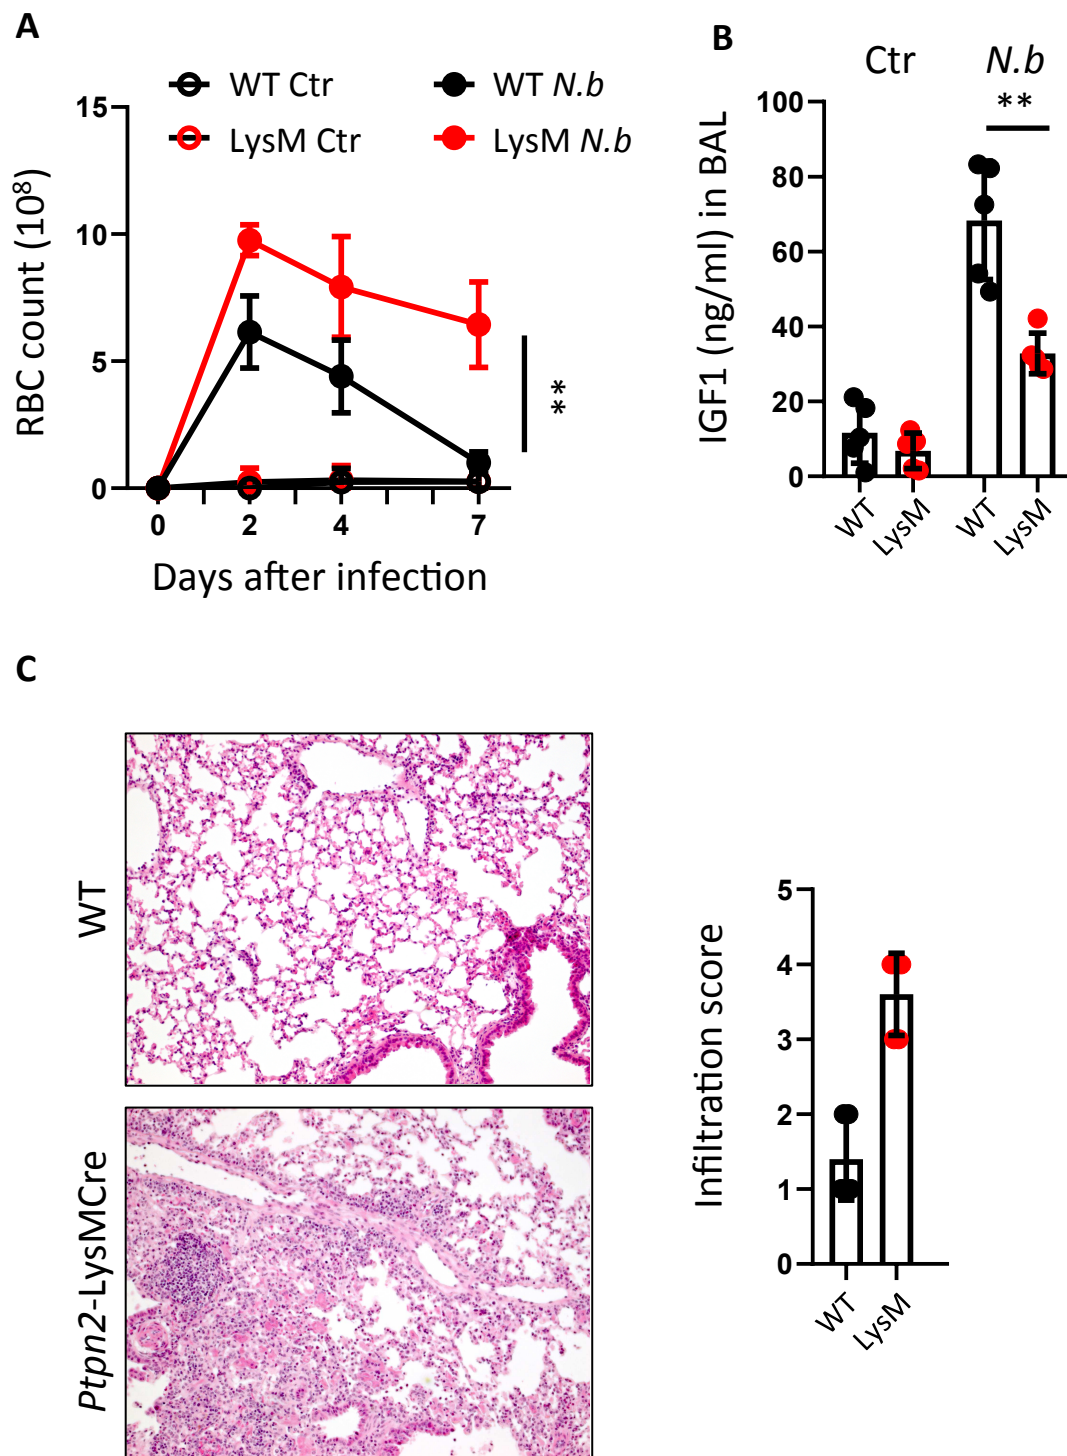

**Supplementary Figure S10. Delayed tissue repair in *Ptpn2-LysMCre* mice.** WT and *Ptpn2-LysMCre* mice were treated as in Figure 1 and BAL analyzed for **A)** red blood cell count at the indicated time points and **B)** IGF1 at day 7 post infection. **C)** WT or *Ptpn2-LysMCre* mice were infected with 500 L3 larvae, let to recover for 30 days and re-infected with 500 larvae after 30 days. 7 days after the secondary infection lung tissue was harvested and analyzed for lung pathology. n = 5 individual per genotype.

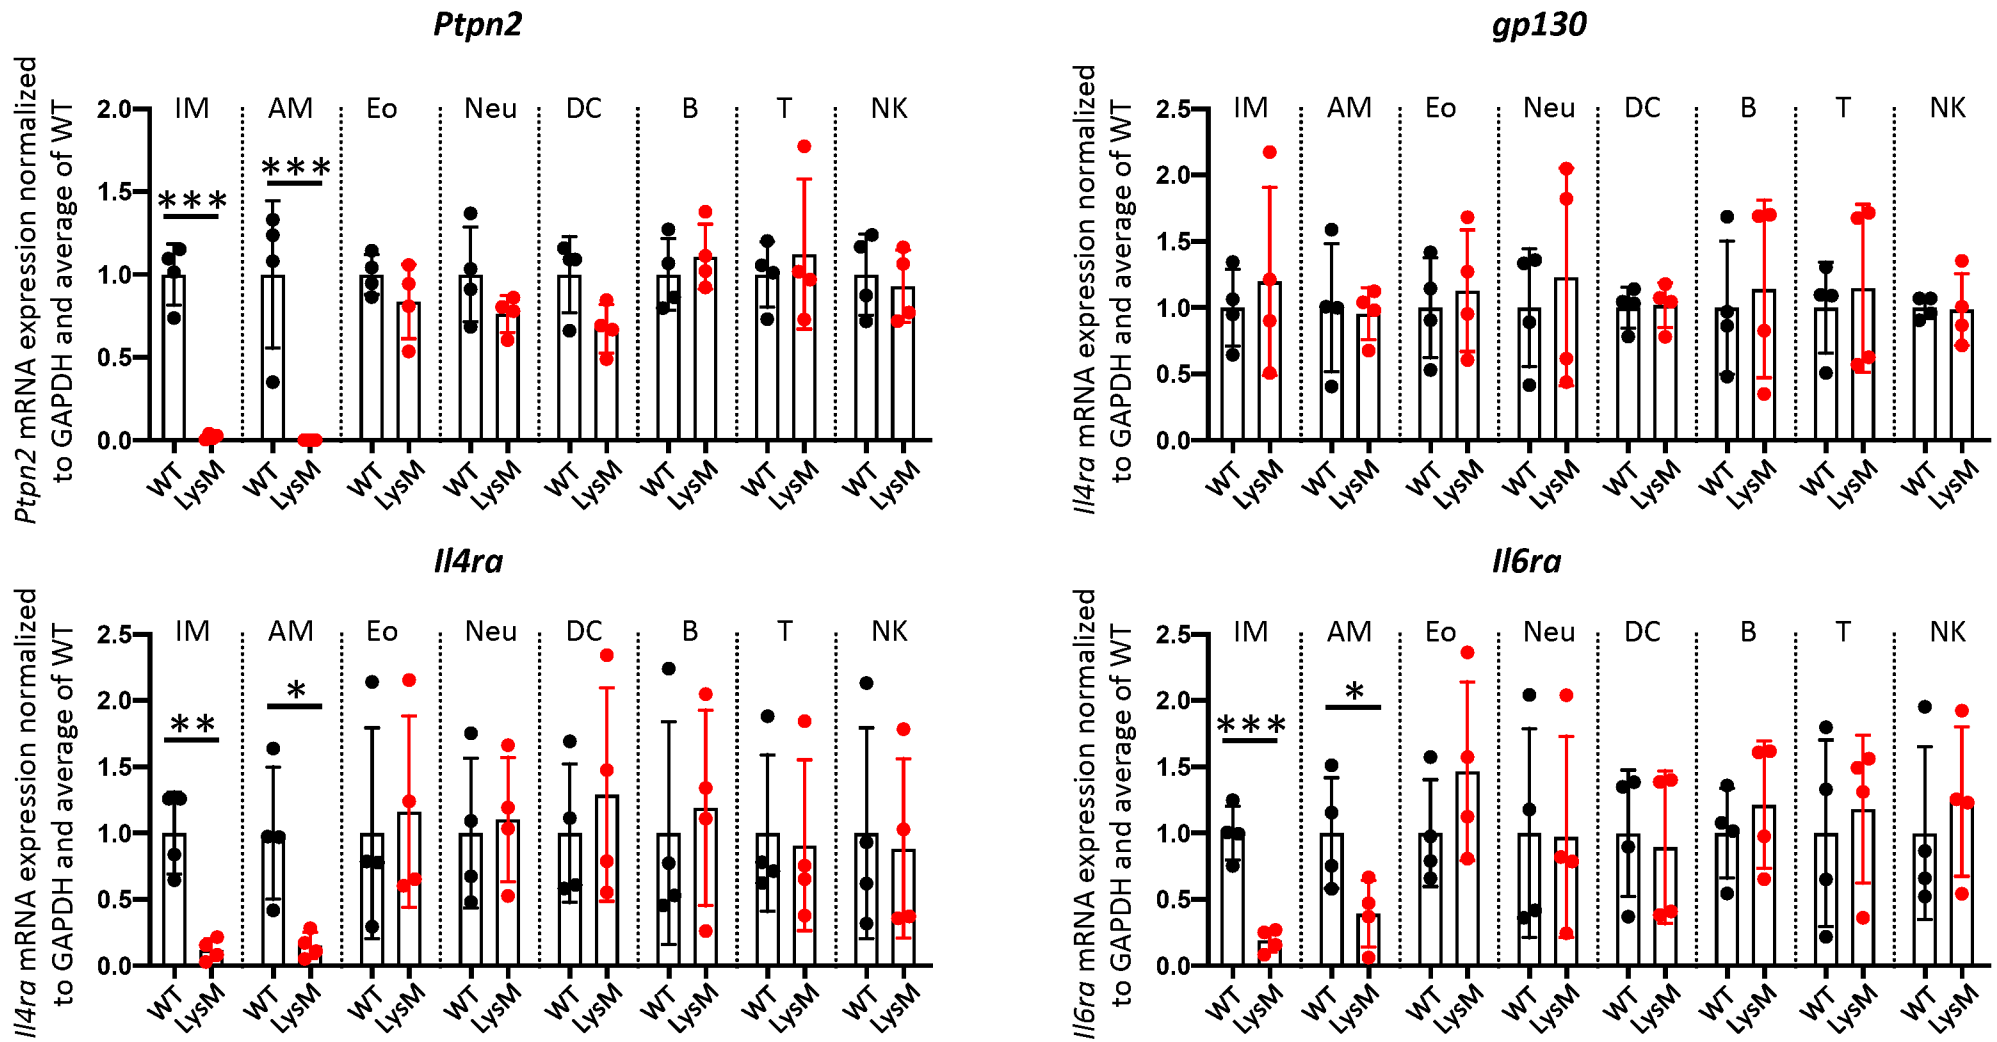

**Supplementary Figure S11. Reduced *Il6ra* and *Il4ra* mRNA expression in macrophages from the lung of *Ptpn2*-LysMCre mice.** The indicated immune cell subsets were sorted from lung tissue from *N. brasiliensis* infected WT or *Ptpn2*-LysMCre (LysM) mice and analyzed for mRNA expression of *Ptpn2*, *Il4ra*, *gp130*, and *Il6ra*. n = 4 mice per genotype. \* = p < 0.05, \*\* = p < 0.01, Kruskal-Wallis with Dunn's multiple comparisons test. Related to main Figure 7.

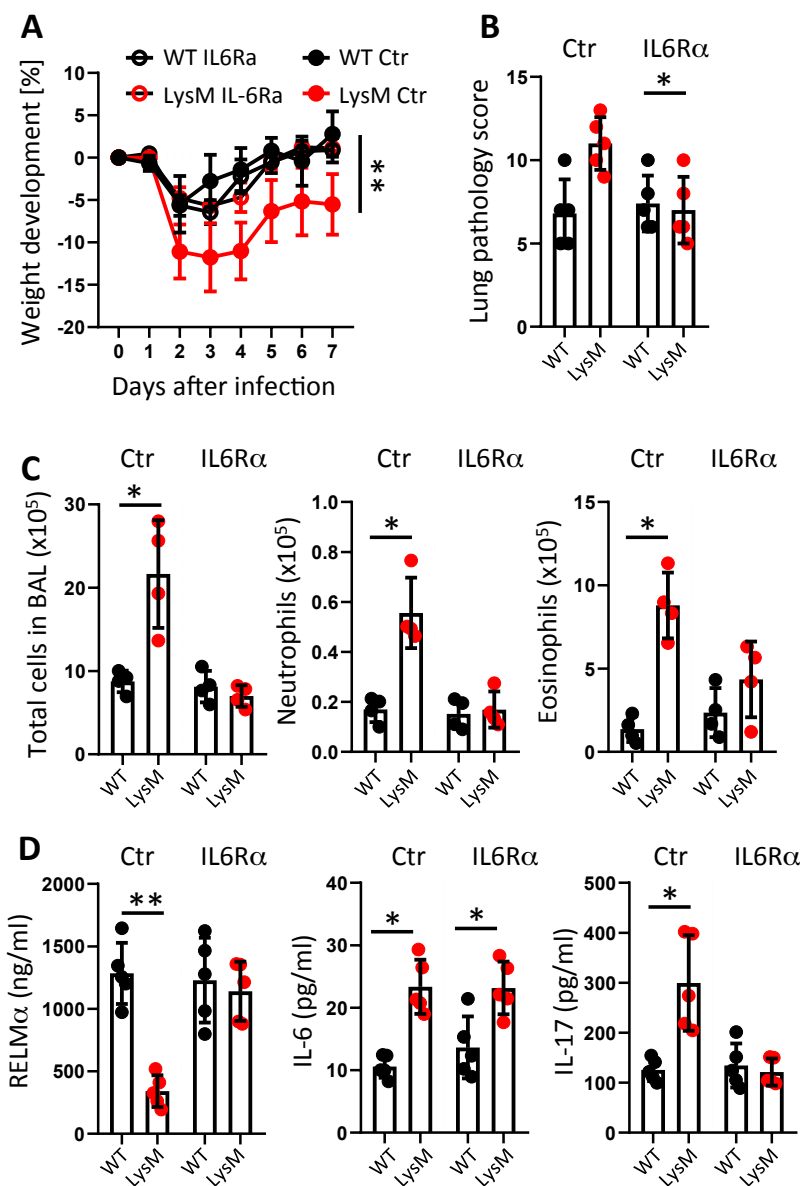

**Supplementary Figure S12. IL-6Ra injection reduces severity of *Nippostrongylus brasiliensis*-induced disease in *Ptpn2*-LysMCre mice.** 7-week-old *Ptpn2*-LysMCre and their WT littermates were infected with 500 *Nippostrongylus brasiliensis* L3 stage larvae and injected with 50mg IL-6Ra intraperitoneally once daily. **A)** Weight development post infection, **B)** lung pathology scores, **C)** numbers of infiltrating cells (total), neutrophils, eosinophils, and macrophages in BAL fluid at day 7. **D)** Levels of the indicated cytokines in BAL fluid on day 7 post infection. Representative results from one out of two independent experiments with 3-5 mice per group, each. \* =  $p < 0.05$ , \*\* =  $p < 0.01$ , \*\*\* =  $p < 0.001$ , Kruskal-Wallis with Dunn's multiple comparisons test.
